# Supplementary material for: Post-synthesis, characterization and catalytic properties of fluorine-planted MWW-type titanosilicate
Source: Royal Society of Chemistry journal article supplement (doi:10.1039/c3cp44700f), 2013-01-01
Supplement: c3cp44700f.pdf [file c3cp44700f.pdf]

## Electronic Supplementary Information (ESI)

### Post-synthesis, Characterization and Catalytic properties of Fluorine-Planted MWW-Type Titanosilicate

Xiangqing Fang,<sup>a</sup> Qiang Wang,<sup>b</sup> Anmin Zheng,<sup>b</sup> Yueming Liu,<sup>\*a</sup> Longfei Lin,<sup>a</sup>

Haihong Wu,<sup>a</sup> Feng Deng,<sup>b</sup> Mingyuan He<sup>a</sup> and Peng Wu<sup>\*a</sup>

<sup>a</sup> Shanghai Key Laboratory of Green Chemistry and Chemical Processes, Department  
of Chemistry, East China Normal University, North Zhongshan Rd. 3663, Shanghai,  
China

<sup>b</sup> Wuhan Center for Magnetic Resonance, State Key Laboratory of Magnetic  
Resonance and Atomic and Molecular Physics, Wuhan Institute of Physics and  
Mathematics, The Chinese Academy of Sciences, Wuhan 430071, China

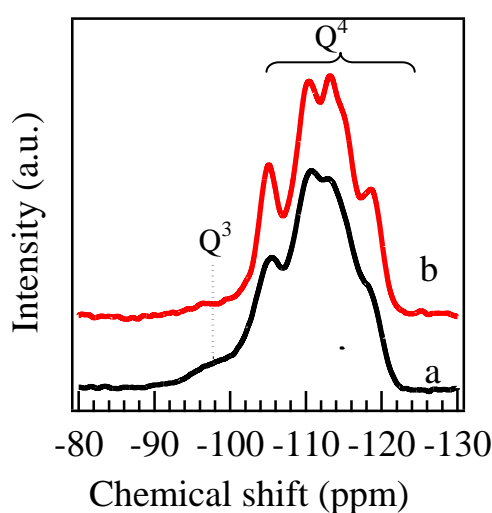

**Fig. S1** Solid-state <sup>29</sup>Si MAS NMR spectra of Ti-MWW (a) and F-Ti-MWW (b).

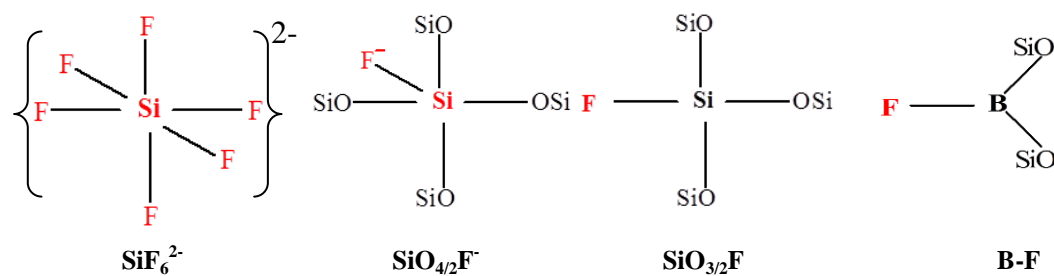

**Fig. S2** The possible structure of Si-F species and B-F units in the F-Ti-MWW.

**Table S1** Epoxidation of 1-hexene with  $\text{H}_2\text{O}_2$  over various F-Ti-MWW<sup>a</sup>

| No. | Treatment additive <sup>b</sup>  | 1-Hexene conv. /% | $\text{H}_2\text{O}_2$ conv. /% |
|-----|----------------------------------|-------------------|---------------------------------|
| 1   | Conventional Ti-MWW <sup>c</sup> | 41.6              | 49.4                            |
| 2   | $\text{NH}_4\text{F}$            | 58.5              | 67.4                            |
| 3   | $\text{NaF}$                     | 56.3              | 69.7                            |
| 4   | $\text{KF}$                      | 55.2              | 65.6                            |
| 5   | $\text{HF}$                      | 44.0              | 59.8                            |
| 6   | $\text{NH}_4\text{NO}_3$         | 40.3              | 51.3                            |

<sup>a</sup> Reaction conditions: catalyst, 50 mg; MeCN, 10 mL; 1-hexene, 10 mmol;  $\text{H}_2\text{O}_2$  (30 wt %), 10 mmol; temp., 333 K; time, 2 h.

<sup>b</sup> Treatment conditions: the Ti-MWW precursor ( $\text{Si}/\text{Ti} = 25$  in the gel) was treated in 2 M  $\text{HNO}_3$  solution with the addition of various additives ( $\text{Si}/\text{additive}$  molar ratio = 26) and a solid-to-liquid ratio of 1 g to 30 mL at 377 K for 5 h, then the acid-treated products were finally calcined at 823 K for 6 h.

<sup>c</sup> Ti-MWW prepared with conventional method in the absence of fluorine.

**Table S2** Chemical compositions of fresh and deactivated (used 10 times) catalysts.

| No. | Catalyst             | Si/Ti | Si/B |
|-----|----------------------|-------|------|
| 1   | fresh Ti-MWW         | 42    | 87   |
| 2   | deactivated Ti-MWW   | 59    | 237  |
| 3   | fresh F-Ti-MWW       | 29    | 68   |
| 4   | deactivated F-Ti-MWW | 47    | 203  |

<sup>a</sup> Molar ratio determined by ICP.
